# Supplementary material
Source: HighWire-hosted journal article supplement (https://erj.ersjournals.com/content/56/3/2002645)
Supplement: inline-supplementary-material-1 [file inline-supplementary-material-1.pdf]

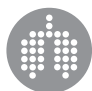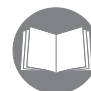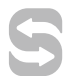

SHAREABLE PDF

# Carriers of a single *CFTR* mutation are asymptomatic: an evolving dogma?

Clémence Martin <sup>1,2</sup> and Pierre-Régis Burgel <sup>1,2</sup>

**Affiliations:** <sup>1</sup>Institut Cochin, Inserm U1016 and Université de Paris, Paris, France. <sup>2</sup>Dept of Respiratory Medicine and National Reference Center for Cystic Fibrosis Cochin Hospital, Assistance Publique, Hôpitaux de Paris, Paris, France.

**Correspondence:** Pierre-Régis Burgel, Dept of Respiratory Medicine, Cochin Hospital, 27 rue du Faubourg Saint Jacques, 75014 Paris, France. E-mail: pierre-regis.burgel@aphp.fr

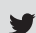

@ERSpublications

CF carriers may be at higher risk of multiple *CFTR*-related diseases <https://bit.ly/3foJK7n>

**Cite this article as:** Martin C, Burgel P-R. Carriers of a single *CFTR* mutation are asymptomatic: an evolving dogma? *Eur Respir J* 2020; 56: 2002645 [https://doi.org/10.1183/13993003.02645-2020].

This single-page version can be shared freely online.

Cystic fibrosis (CF) is a genetic autosomal recessive disease due to mutations in the gene encoding for the cystic fibrosis transmembrane conductance regulator (CFTR) protein [1, 2]. Mutations in the *CFTR* gene may cause a reduction of CFTR protein function, leading to abnormal chloride and bicarbonate transport in epithelia, resulting in abnormal mucus properties and a multiorgan disease dominated by respiratory and gastro-intestinal abnormalities [3]. The level of CFTR protein function is an important determinant of disease in humans and CF patients carrying two disease-causing *CFTR* mutations usually have very low levels of functional CFTR protein. Carriers of a single *CFTR* mutation (also called CF carriers) express 50% CFTR protein function, a level that has been considered sufficient to stay healthy [3]. CF carriers represent approximately 1 in 35 Caucasian in the USA, accounting for more than 10 million individuals [4]. CF carriers are generally informed that they are at risk of transmitting the mutation to their children and/or to have a child with CF; they are also informed that having one *CFTR* gene mutation does not cause symptoms [4]. Having a single *CFTR* mutation has even been suspected to provide a selective advantage, as CF carriers may withstand secretory diarrhoea better than non-carrier individuals, leading to a possible protection against cholera [5]. This latter finding has been suggested to explain the high rate of CF carriers in Caucasian populations [1].
